# Supplementary material
Source: PubMed Central journal article supplement (PMC5767874)
Supplement: 10.1074_M117.815381_jbc.M117.815381-1.pdf [file 10.1074_M117.815381_jbc.M117.815381-1.pdf]

Title: **The EPAC-Rap1 pathway prevents and reverses cytokine-induced retinal vascular permeability**

Carla J. Ramos, Chengmao Lin, Xuwen Liu, David A. Antonetti

**Department of Ophthalmology and Visual Sciences, University of Michigan, Kellogg Eye Center,  
Ann Arbor, MI 48105, USA.**

Running title: **EPAC-Rap1 activation promotes vascular blood-retinal barrier**

Address correspondence to: 1000 Wall St, Ann Arbor, MI 48105, USA

Keywords: blood-retinal barrier, vascular endothelial growth factor, tumor necrosis factor, tight junction,  
EPAC, Rap1, small GTPases

**Materials:**

**Reagents:** The following reagents were purchased from Tocris Bioscience: the cAMP analog 8-pCPT-2-O-Me-cAMP-AM (8CPT-AM) specific for EPAC (catalog #4853), EPAC2 inhibitor (HJC 0350) 2,4-Dimethyl-1-[(2,4,6-trimethylphenyl) sulfonyl]-1H-pyrrole (catalog #4844), and EPAC inhibitor (ESI 09)  $\alpha$ -[(2-(3-Chlorophenyl) hydrazinylidene)-5-(1,1-dimethylethyl)- $\beta$ -oxo-3-isoxazolepropanenitrile (catalog #4773). Recombinant human VEGF165 was from R&D Systems (Minneapolis, MN). Power SYBR Green PCR Master Mix (catalog # 4367659) was from Thermo Fisher Scientific (Warrington, UK).

**Antibodies (Ab):** The following antibodies were used for western blotting. Purchased from Cell Signaling: AKT rabbit polyclonal (pAb) (catalog #9272), phospho-AKT (Ser473) rabbit monoclonal (mAb) (catalog #4060), phospho-CREB (Ser133) rabbit mAb (catalog #9198). CREB rabbit mAb (catalog #9197), VEGFR2 rabbit mAb (catalog #2479), phospho-VEGFR2 (Tyr1175) rabbit mAb (catalog #3770), Erk1/2 rabbit pAb (catalog #9102), phospho-Erk1/2 (T202/Y204) mouse (catalog #9106L) and  $\beta$ -actin mouse mAb (catalog #3700). EPAC rabbit pAb (catalog #sc-25632) was purchased from Santa Cruz Biotechnology (SCBT) (Santa Cruz, CA, USA). The following were used in tissue and cell staining: Rap1A mouse mAb (catalog #sc-373968) SCBT, CA, IB4, Hoescht. ZO-1 rat (catalog #MABT11, Millipore, USA), Claudin-5 rabbit (catalog #34-1600, Invitrogen, USA), and Occludin mouse 488 Alexa (catalog #331588, Lifetech, USA).

SUPPLEMENT DATA

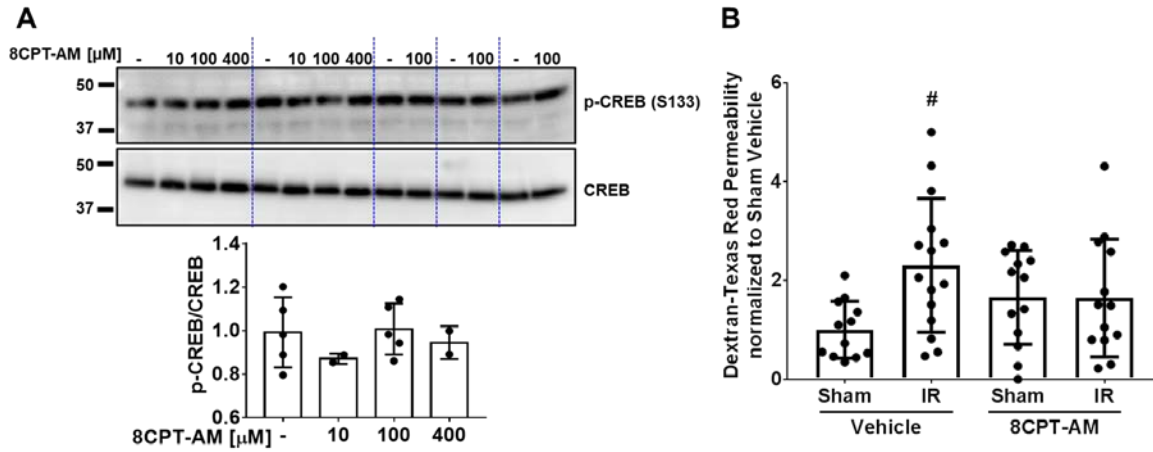

**Figure S1. 8CPT-AM reverses ischemia reperfusion-induced permeability.** **A.** 8CPT-AM was intravitreally injected in mice at various concentrations to determine if the PKA pathway is activated. The different doses of 8CPT-AM did not cause a difference in CREB phosphorylation in comparison to control,  $n \geq 2$ . **B.** Retinal ischemia in mice was achieved by increasing intraocular pressure with PBS delivered to the anterior chamber to prevent blood flow for 90 min. 48 hours later vehicle or 8CPT-AM at 100 $\mu\text{M}$  (278ng) was delivered by intravitreal injection and permeability was determined by measuring accumulation of 70kDa Dextran-Texas Red in the retina. Results are expressed as the mean relative to the control  $\pm$  SD, Bonferroni's post hoc test  $\#p < 0.05$  compared to vehicle sham.

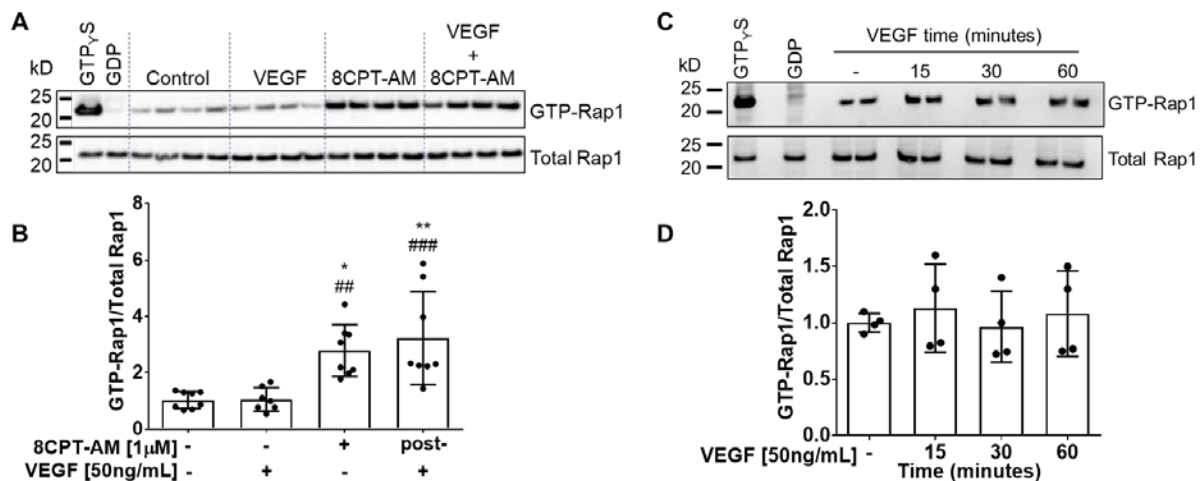

**Figure S2. VEGF does not alter basal GTP bound Rap1 levels in BREC.** **A.** GTP bound Rap1 was determined by GTP-bound Rap1 capture assay using GST-RalGDS RBD. VEGF (50ng/mL) was added for 24 hours prior to 8CPT-AM (1 $\mu$ M) for 30 minutes. Quantification shown in **B.** with a total  $n \geq 8$ . **C.** VEGF time course, 15 to 60 minutes, was performed on BREC. GTP-bound Rap1 levels were determined using the capture assay and quantification shown in **D.**

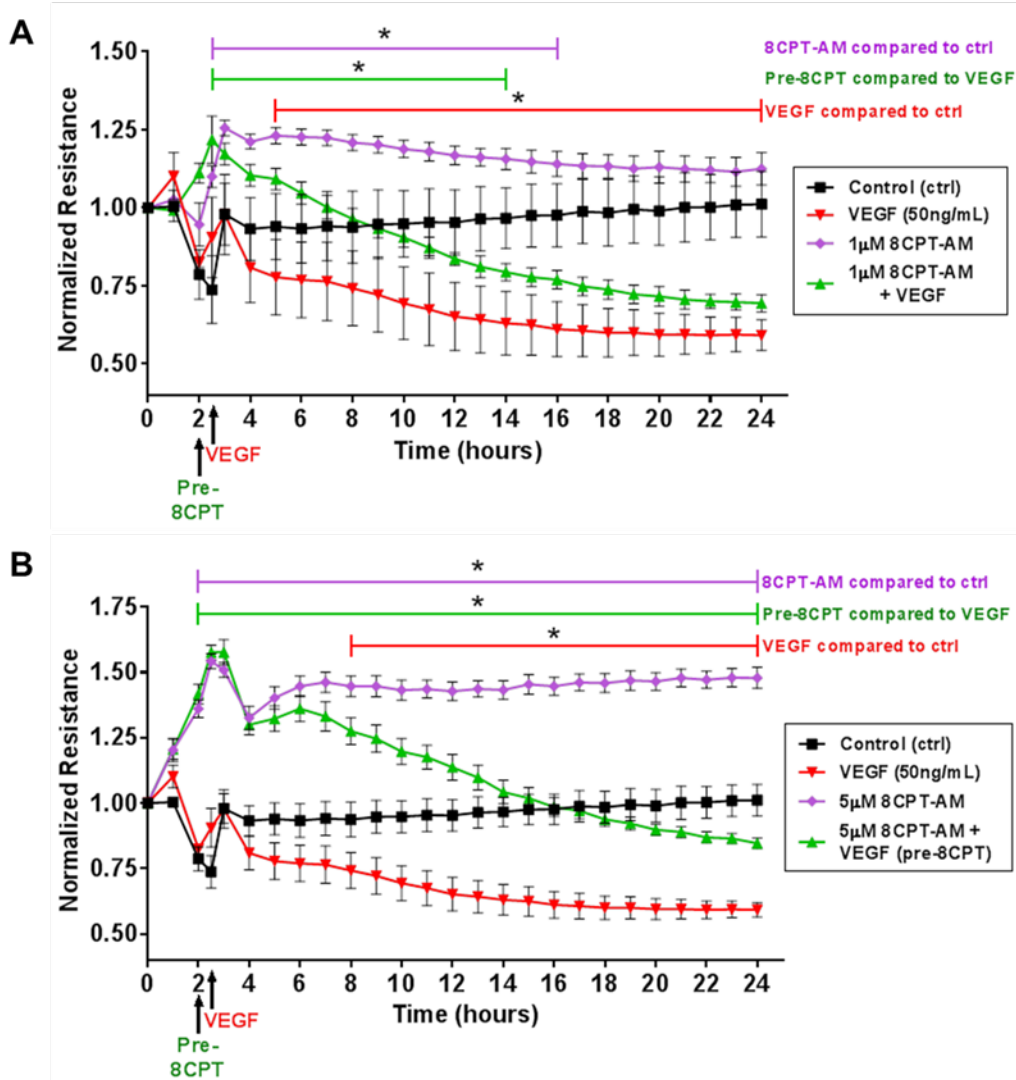

**Figure S3. Higher concentration of 8CPT-AM maintains a high resistance in BRECs.** BRECs were seeded on 8W10E+ arrays and TEER was measured continually every hour on the ECIS Z-theta instrument. 8CPT-AM at the different concentrations 1 $\mu$ M and 5 $\mu$ M maintained BRECs TEER statistically significantly higher than controls. **A.** 8CPT-AM (1 $\mu$ M) pre-treatment is significantly different from VEGF treatment in BRECs for 14 hr (\* $p$ <0.0001). **B.** 8CPT-AM (5 $\mu$ M) pre-treatment is significantly different from VEGF for at least 24 hr (\* $p$ <0.0001).

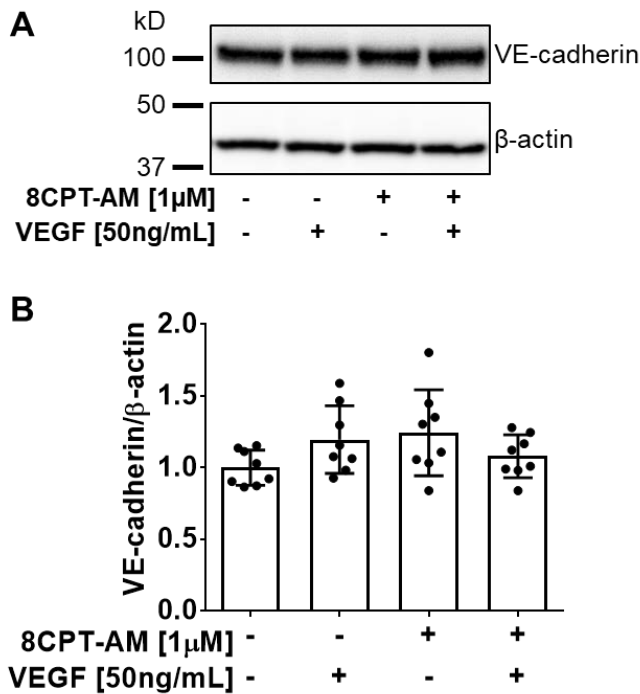

**Figure S4. 8CPT-AM does not alter VE-cadherin protein expression.** **A.** Changes in VE-cadherin total protein expression with VEGF or 8CPT-AM were measured using western blot. No changes in VE-cadherin expression were observed in any of the experimental conditions. **B.** Results are expressed as the mean relative to the control  $\pm$  SD,  $n \geq 4$  per group with analysis by One-Way ANOVA with Bonferroni's post hoc test.

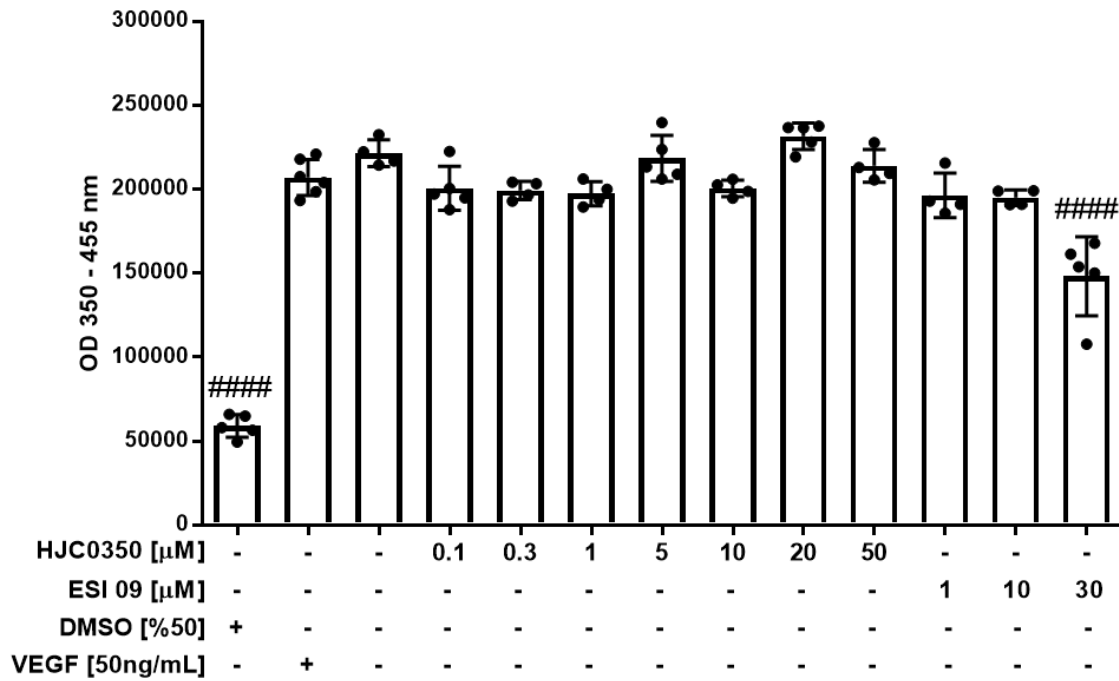

**Figure S5. EPAC inhibitor, HJC0350, is not cytotoxic to BRECs.** BRECs were incubated for 1.5 hours with 50% DMSO, VEGF (50ng/mL) and different concentrations of HJC0350 and ESI 09, an EPAC1 and EPAC2 inhibitor. The viability of cells was measured with a fluorogenic, cell-permeant, peptide substrate (GF-AFC). Results are expressed as the mean relative to the control with a total of  $n \geq 4$  one-way ANOVA analysis and Bonferroni post-test  $####P < 0.0001$ .

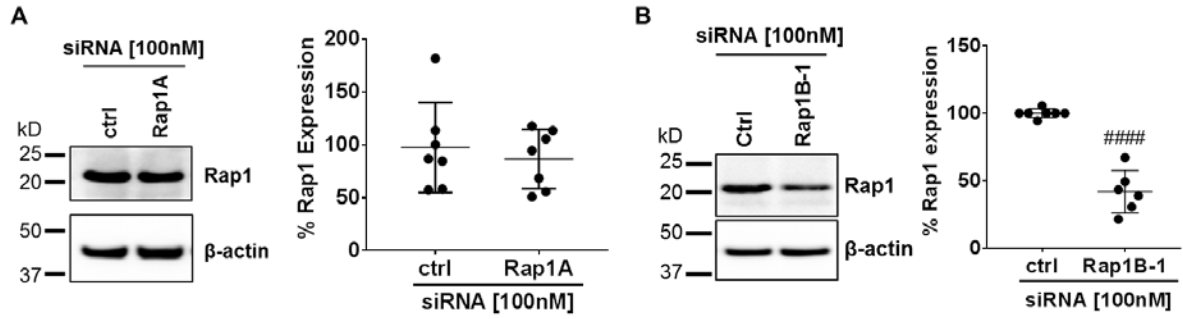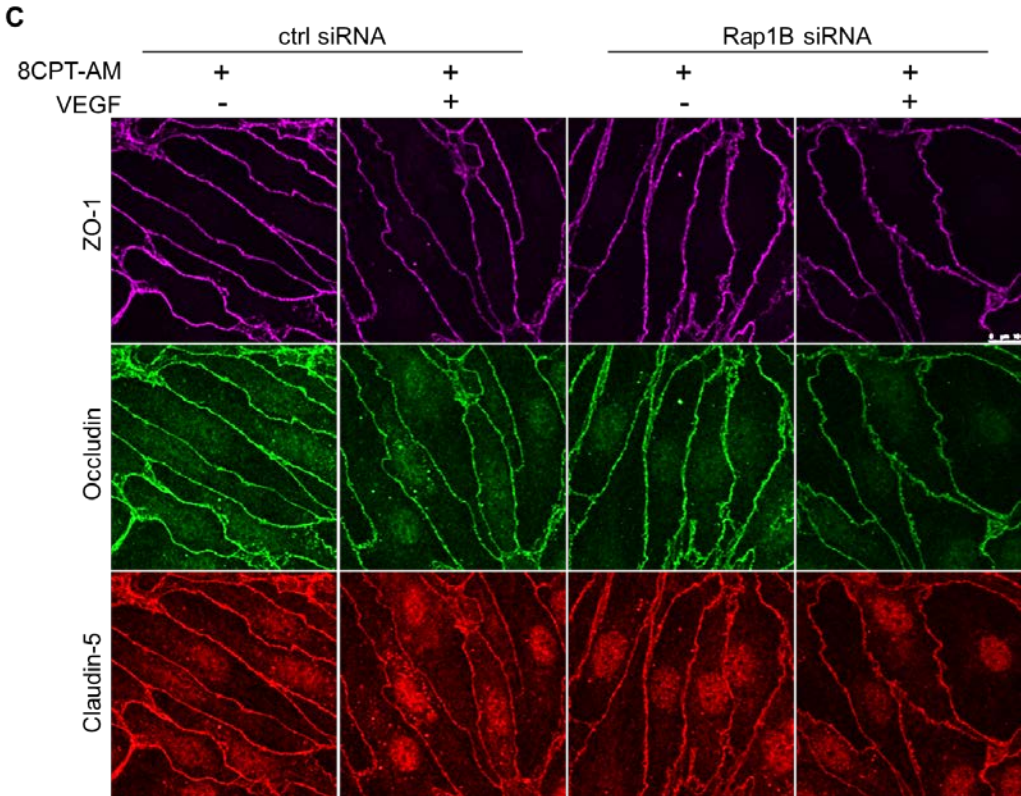

**Figure S6. 8CPT-AM restores tight junction organization in Rap1B knockdown BRECs.** **A.** Western blot shows no Rap1 protein knockdown with Rap1A siRNA [100nM] in BRECs. **B.** Western blot shows a 58% Rap1 knockdown with 100nM Rap1B-1 siRNA, Student's t-test <sup>####</sup>p < 0.0001, n≥6. **C.** Immunofluorescence staining of TJ proteins ZO-1, occludin, and claudin-5 was performed to assess the organization of TJ proteins after Rap1B knockdown and treated with 8CPT-AM (1μM) for a total time of 1.5 hours or VEGF (50ng/mL) for 1 hour. Scale bar, 10μm.
